# Supplementary material for: FeCo alloy nanoparticle decorated cellulose based carbon aerogel as a low-cost and efficient electromagnetic microwave absorber
Source: Royal Society of Chemistry journal article supplement (doi:10.1039/d1tc04494j), 2021-11-19
Supplement: d1tc04494j1.pdf [file d1tc04494j1.pdf]

## Supporting Information

### FeCo Alloy Nanoparticles Decorated Cellulose Based Carbon Aerogel as Low-Cost and Efficient Electromagnetic Microwave Absorber

Yan Guo,<sup>1</sup> Dedong Wang,<sup>1</sup> Yu Tian,<sup>1</sup> Jingwen Wang,<sup>1</sup> Tiantian Bai,<sup>1</sup> Hu Liu,<sup>1\*</sup> Zhanhu Guo,<sup>2</sup>  
Chuntai Liu,<sup>1\*</sup> Changyu Shen<sup>1</sup>

<sup>1</sup>Key Laboratory of Materials Processing and Mold (Zhengzhou University), Ministry of Education; National Engineering Research Center for Advanced Polymer Processing Technology, Zhengzhou University, Zhengzhou, Henan 450002, China

<sup>2</sup> Integrated Composites Laboratory (ICL), Department of Chemical & Biomolecular Engineering, University of Tennessee, Knoxville, Tennessee 37996, United States

*\*: Correspondence authors*

E-mail addresses: [liuhu@zzu.edu.cn](mailto:liuhu@zzu.edu.cn) (H. L.), [ctliu@zzu.edu.cn](mailto:ctliu@zzu.edu.cn) (C. L.)

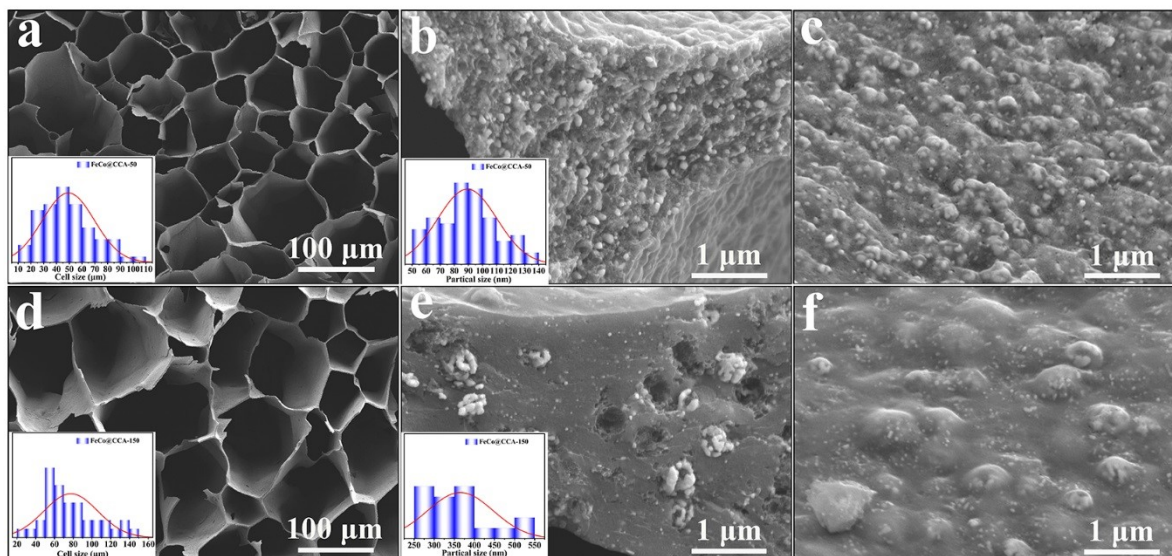

**Fig. S1.** SEM images of (a, b, c) FeCo@CCA-50, (d, e, f) FeCo@CCA-150.

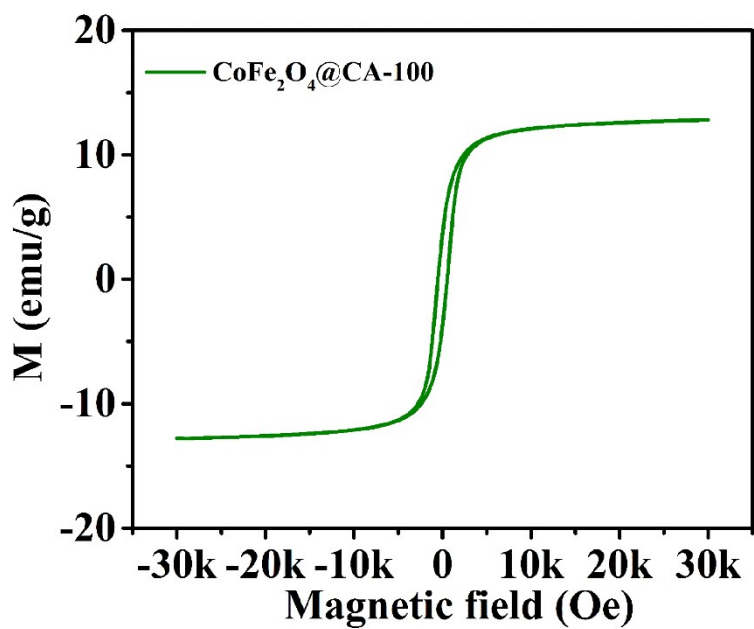

**Fig. S2.** Room temperature magnetic hysteresis loop of CoFe<sub>2</sub>O<sub>4</sub>@CA-100.

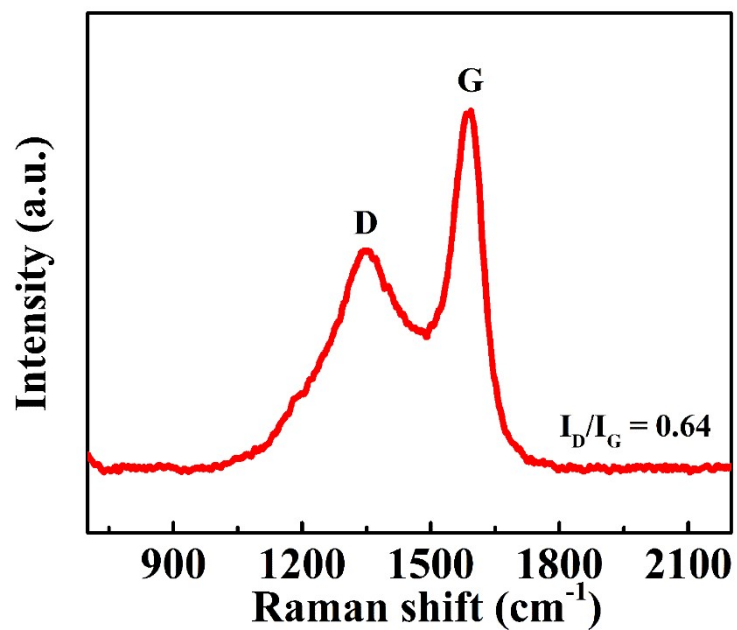

Fig. S3. Raman spectra of FeCo@CCA-100.

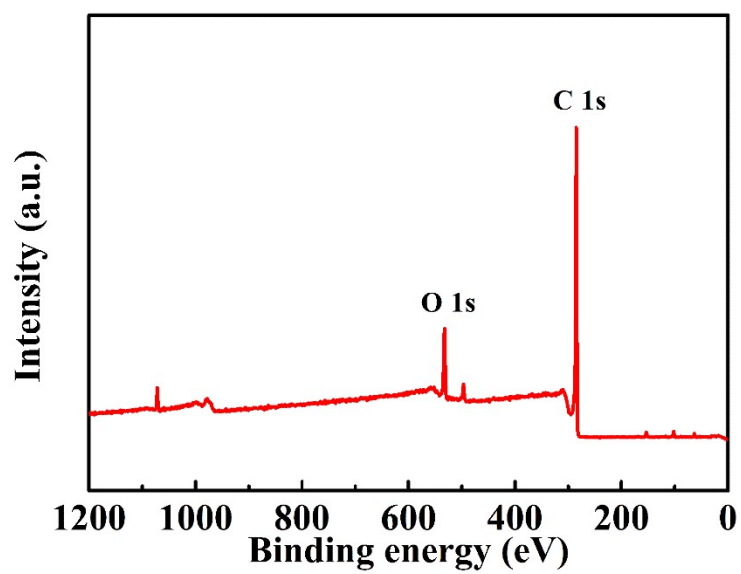

Fig. S4. PS spectra of carbonized cellulose at 580 °C.
